# Supplementary material for: Influence of the FCGR2A rs1801274 and FCGR3A rs396991 Polymorphisms on Response to Abatacept in Patients with Rheumatoid Arthritis
Source: MDPI journal article supplement (doi:10.3390/jpm11060573), 2021-06-18
Supplement: s1 [file s1]

Table S11. Predictors of LDA at 6 and 12 months of treatment with abatacept in rheumatoid arthritis patients (bivariate analysis)

|                             | 6 MONTHS             |               |                   |       |    |        | 12 MONTHS                   |                      |             |                 |       |      |           |
|-----------------------------|----------------------|---------------|-------------------|-------|----|--------|-----------------------------|----------------------|-------------|-----------------|-------|------|-----------|
| Clinical variable           | Low disease activity |               |                   |       |    |        | Clinical variable           | Low disease activity |             |                 |       |      |           |
|                             | N                    | No LDA        | LDA               | p     | OR | 95% CI |                             | N                    | No LDA      | LDA             | p     | OR   | 95% CI    |
| <b>Sex</b>                  |                      |               |                   |       |    |        | <b>Sex</b>                  |                      |             |                 |       |      |           |
| <b>Women</b>                | 89                   | 72 (80.9)     | 17 (19.1)         | 0.795 | –  | –      | <b>Women</b>                | 75                   | 60 (80)     | 15 (20)         | 0.308 | –    | –         |
| <b>Men</b>                  | 31                   | 24 (77.4)     | 7 (22.6)          |       |    |        | <b>Men</b>                  | 30                   | 21 (70)     | 9 (30)          |       |      |           |
| <b>Smoking</b>              |                      |               |                   |       |    |        | <b>Smoking</b>              |                      |             |                 |       |      |           |
| <b>Smoker</b>               | 18                   | 16 (88.9)     | 2 (11.1)          | 0.215 | –  | –      | <b>Smoker</b>               | 16                   | 11 (68.8)   | 5 (31.2)        | 0.135 | –    | –         |
| <b>Ex-smoker</b>            | 14                   | 9 (64.3)      | 5 (35.7)          |       |    |        | <b>Ex-smoker</b>            | 12                   | 7 (58.3)    | 5 (41.7)        |       |      |           |
| <b>Non-smoker</b>           | 88                   | 71 (80.7)     | 17 (19.3)         |       |    |        | <b>Non-smoker</b>           | 77                   | 63 (81.8)   | 14 (18.2)       |       |      |           |
| <b>Age at Dx</b>            | 120                  | 45.06±13.84   | 45.54±13.53       | 0.877 | –  | –      | <b>Age at Dx</b>            | 105                  | 44.11±14.09 | 49.75±13.31     | 0.084 | –    | –         |
| <b>Years with RA</b>        | 120                  | 16 (10–21)    | 13.5 (6.75–21.25) | 0.239 | –  | –      | <b>Years with RA</b>        | 105                  | 14 (8–21)   | 16 (11.75–20.5) | 0.494 | –    | –         |
| <b>ABA start age</b>        | 120                  | 56.83±13.13   | 55.79±12.86       | 0.728 | –  | –      | <b>ABA start age</b>        | 105                  | 55.54±13.68 | 61.92 ± 11.26   | 0.039 | 1.04 | 1.00–1.09 |
| <b>ABA duration</b>         | 120                  | 24 (14–45.25) | 25.5 (15–39.50)   | 0.763 | –  | –      | <b>ABA duration</b>         | 105                  | 26 (17–46)  | 31 (23–66.25)   | 0.339 | –    | –         |
| <b>Administr.</b>           |                      |               |                   |       |    |        | <b>Administr.</b>           |                      |             |                 |       |      |           |
| <b>SC</b>                   | 68                   | 50 (73.5)     | 18 (26.5)         | 0.064 | –  | –      | <b>SC</b>                   | 60                   | 48 (80)     | 12 (20)         | 0.485 | –    | –         |
| <b>IV</b>                   | 52                   | 46 (88.5)     | 6 (11.5)          |       |    |        | <b>IV</b>                   | 45                   | 33 (73.3)   | 12 (26.7)       |       |      |           |
| <b>Concomitant csDMARDs</b> |                      |               |                   |       |    |        | <b>Concomitant csDMARDs</b> |                      |             |                 |       |      |           |
| <b>MTX</b>                  | 42                   | 36 (85.7)     | 6 (14.3)          | 0.509 | –  | –      | <b>MTX</b>                  | 37                   | 28 (75.7)   | 9 (24.3)        | 0.788 | –    | –         |
| <b>LFN</b>                  | 14                   | 11 (78.6)     | 3 (21.4)          |       |    |        | <b>LFN</b>                  | 13                   | 11 (84.6)   | 2 (15.4)        |       |      |           |

|                          |     |             |             |       |      |           |                          |     |             |               |       |      |           |
|--------------------------|-----|-------------|-------------|-------|------|-----------|--------------------------|-----|-------------|---------------|-------|------|-----------|
| none                     | 64  | 49 (76.6)   | 15 (23.4)   |       |      |           | none                     | 55  | 42 (76.4)   | 13 (23.6)     |       |      |           |
| Concom. GCs              |     |             |             |       |      |           | Concom. GCs              |     |             |               |       |      |           |
| Yes                      | 102 | 83 (81.4)   | 19 (18.6)   | 0.371 | –    | –         | Yes                      | 89  | 72 (80.9)   | 17 (19.1)     | 0.031 | 3.29 | 1.07–10.1 |
| No                       | 18  | 13 (72.2)   | 5 (27.8)    |       |      |           | No                       | 16  | 9 (56.2)    | 7 (43.8)      |       |      |           |
| Monotherapy              |     |             |             |       |      |           | Monotherapy              |     |             |               |       |      |           |
| No                       | 113 | 91 (80.5)   | 22 (19.5)   | 0.559 | –    | –         | No                       | 98  | 78 (79.6)   | 20 (20.4)     | 0.025 | 5.2  | 1.08–25.3 |
| Yes                      | 7   | 5 (71.4)    | 2 (28.6)    |       |      |           | Yes                      | 7   | 3 (42.9)    | 4 (57.1)      |       |      |           |
| Number of previous BTs   | 120 | 2 (1–3)     | 2 (1–3)     | 0.485 | –    | –         | Number of previous BTs   | 105 | 2 (1–3)     | 2 (1–3)       | 0.665 | –    | –         |
| Duration of previous BTs | 120 | 48 (24–72)  | 24 (11–63)  | 0.064 | –    | –         | Duration of previous BTs | 105 | 24 (12–72)  | 42 (33–60.25) | 0.336 | –    | –         |
| Previous BTs             |     |             |             |       |      |           | Previous BTs             |     |             |               |       |      |           |
| Naive                    | 15  | 10 (66.7)   | 5 (33.3)    | 0.557 | –    | –         | Naive                    | 14  | 11 (78.6)   | 3 (21.4)      | 0.988 | –    | –         |
| 1 TNFi                   | 31  | 26 (83.9)   | 5 (16.1)    |       |      |           | 1 TNFi                   | 28  | 22 (78.6)   | 6 (21.4)      |       |      |           |
| 2 TNFis                  | 34  | 28 (82.4)   | 6 (17.6)    |       |      |           | 2 TNFis                  | 31  | 24 (77.4)   | 7 (22.6)      |       |      |           |
| 3 or more TNFis          | 40  | 32 (80)     | 8 (20)      |       |      |           | 3 or more TNFis          | 32  | 24 (75)     | 8 (25)        |       |      |           |
| RF                       |     |             |             |       |      |           | RF                       |     |             |               |       |      |           |
| Negative                 | 24  | 20 (83.3)   | 4 (16.7)    | 0.648 | –    | –         | Negative                 | 22  | 17 (77.3)   | 5 (22.7)      | 0.987 | –    | –         |
| Positive                 | 96  | 76 (79.2)   | 20 (20.8)   |       |      |           | Positive                 | 83  | 64 (77.1)   | 19 (22.9)     |       |      |           |
| ACPA                     |     |             |             |       |      |           | ACPA                     |     |             |               |       |      |           |
| Negative                 | 35  | 31 (88.6)   | 4 (11.4)    | 0.208 | –    | –         | Negative                 | 30  | 23 (76.7)   | 7 (23.3)      | 0.941 | –    | –         |
| Positive                 | 85  | 65 (76.5)   | 20 (23.5)   |       |      |           | Positive                 | 75  | 58 (77.3)   | 17 (22.7)     |       |      |           |
| DAS28                    | 120 | 4.85 ± 1.42 | 4.07 ± 1.33 | 0.016 | 0.67 | 0.47–0.93 | DAS28                    | 105 | 4.69 ± 1.39 | 4.44 ± 1.39   | 0.448 | –    | –         |

|                                              |     |               |                  |       |      |           |                                              |     |               |                |       |      |            |
|----------------------------------------------|-----|---------------|------------------|-------|------|-----------|----------------------------------------------|-----|---------------|----------------|-------|------|------------|
| <b>Baseline NPJ</b>                          | 120 | 6.5 (3–10)    | 6 (0.75–8)       | 0.115 | –    | –         | <b>Baseline NPJ</b>                          | 105 | 6 (2–9)       | 5 (3–9.25)     | 0.881 | –    | –          |
| <b>Baseline NSJ</b>                          | 120 | 3 (0–6)       | 2 (0–3.25)       | 0.219 | –    | –         | <b>Baseline NSJ</b>                          | 105 | 3 (1–5)       | 2 (0–6)        | 0.862 | –    | –          |
| <b>PVAS</b>                                  | 120 | 70 (50–80)    | 50 (30–60)       | 0.002 | 0.96 | 0.94–0.98 | <b>PVAS</b>                                  | 105 | 70 (50–80)    | 60 (37.5–70)   | 0.191 | –    | –          |
| <b>Baseline CRP</b>                          | 120 | 2 (1–4)       | 2.65 (1.45–4.38) | 0.409 | –    | –         | <b>Baseline CRP</b>                          | 105 | 2 (1.12–4.40) | 2.05 (1–3.87)  | 0.619 | –    | –          |
| <b>Baseline ESR</b>                          | 120 | 24 (10–41.25) | 20 (8–32.25)     | 0.439 | –    | –         | <b>Baseline ESR</b>                          | 105 | 22 (12–36)    | 15 (8.75–39.5) | 0.569 | –    | –          |
| <b>HAQ</b>                                   | 120 | 1.75 (1.18–2) | 1.25 (0.79–2)    | 0.051 | 0.49 | 0.25–0.94 | <b>HAQ</b>                                   | 105 | 1.75 (1.13–2) | 1.44 (0.79–2)  | 0.362 | –    | –          |
| <b>FCGR2A rs1801274</b>                      |     |               |                  |       |      |           | <b>FCGR2A rs1801274</b>                      |     |               |                |       |      |            |
| <b>AA</b>                                    | 38  | 26 (68.4)     | 12 (31.6)        | 0.132 | –    | –         | <b>AA</b>                                    | 35  | 32 (91.4)     | 3 (8.6)        | 0.029 | 5.33 | 1.57–24.70 |
| <b>GG</b>                                    | 29  | 25 (86.2)     | 4 (13.8)         |       |      |           | <b>GG</b>                                    | 25  | 19 (76)       | 6 (24)         |       |      |            |
| <b>AG</b>                                    | 53  | 45 (84.9)     | 8 (15.1)         |       |      |           | <b>AG</b>                                    | 45  | 30 (66.7)     | 15 (33.3)      |       |      |            |
| <b>A</b>                                     | 91  | 71 (78)       | 20 (22)          | 0.430 | –    | –         | <b>A</b>                                     | 80  | 62 (77.8)     | 18 (22.5)      | 0.867 | –    | –          |
| <b>G</b>                                     | 82  | 70 (85.4)     | 12 (14.6)        | 0.048 | 2.67 | 0.96–7.44 | <b>G</b>                                     | 70  | 49 (70)       | 21 (30)        | 0.014 | 4.57 | 1.26–16.59 |
| <b>FCGR3A rs396991</b>                       |     |               |                  |       |      |           | <b>FCGR3A rs396991</b>                       |     |               |                |       |      |            |
| <b>CC</b>                                    | 22  | 20 (90.9)     | 2 (9.1)          | 0.354 | –    | –         | <b>CC</b>                                    | 21  | 17 (81)       | 4 (19)         | 0.304 | –    | –          |
| <b>AA</b>                                    | 29  | 22 (75.9)     | 7 (24.1)         |       |      |           | <b>AA</b>                                    | 23  | 15 (65.2)     | 8 (34.8)       |       |      |            |
| <b>CA</b>                                    | 69  | 54 (78.3)     | 15 (21.7)        |       |      |           | <b>CA</b>                                    | 61  | 49 (80.3)     | 12 (19.7)      |       |      |            |
| <b>C</b>                                     | 91  | 74 (81.3)     | 17 (18.7)        | 0.595 | –    | –         | <b>C</b>                                     | 82  | 66 (80.5)     | 16 (19.5)      | 0.123 | –    | –          |
| <b>A</b>                                     | 98  | 76 (77.6)     | 22 (22.4)        | 0.157 | –    | –         | <b>A</b>                                     | 84  | 64 (76.2)     | 20 (23.8)      | 0.642 | –    | –          |
| <b>Low-affinity allele<br/>FCGR2A/FCGR3A</b> | 120 | 2 (1–3)       | 2 (1–2.25)       | 0.496 | –    | –         | <b>Low-affinity allele<br/>FCGR2A/FCGR3A</b> | 105 | 2 (1–3)       | 2 (2–3)        | 0.044 | 1.59 | 1.01–2.58  |

ABA: abatacept; ACPA: anti-citrullinated protein antibody; AR: adverse reaction; BT: biological therapy; CI: confidence interval; CRP: C-reactive protein; csDMARD: conventional synthetic disease-modifying antirheumatic drug; DAS28: disease activity score in 28 joints; Dx: diagnosis; ESR: erythrocyte sedimentation rate; EULAR: European League Against Rheumatism criteria; GC: glucocorticoid; HAQ: Health Assessment Questionnaire; IV: intravenous; LFN: leflunomide; MTX: methotrexate; NPJ: number of painful joints; NSJ: number of swollen joints; OR: odds ratio; PVAS: patient visual analogue scale; RA: rheumatoid arthritis; RF: rheumatoid factor; SC: subcutaneous; SD: standard deviation; TNFi: tumor necrosis factor inhibitor.
