# Supplementary material for: Influence of the FCGR2A rs1801274 and FCGR3A rs396991 Polymorphisms on Response to Abatacept in Patients with Rheumatoid Arthritis
Source: MDPI journal article supplement (doi:10.3390/jpm11060573), 2021-06-18
Supplement: s1 [file s1]

**Table S8. Haplotype frequency estimation: LDA at 12 months of ABA**

| <b><i>FCGR2A</i></b><br>rs1801274 | <b><i>FCGR3A</i></b><br>rs396991 | <b>Total</b> | <b>LDA</b> | <b>No LDA</b> | <b>Cumulative<br/>frequency</b> |
|-----------------------------------|----------------------------------|--------------|------------|---------------|---------------------------------|
| A                                 | C                                | 0.2909       | 0.0945     | 0.3321        | 0.2909                          |
| A                                 | A                                | 0.2567       | 0.343      | 0.2481        | 0.5476                          |
| G                                 | A                                | 0.2528       | 0.2403     | 0.2395        | 0.8004                          |
| G                                 | C                                | 0.1996       | 0.3222     | 0.1802        | 1                               |
