# Supplementary material for: Influence of the FCGR2A rs1801274 and FCGR3A rs396991 Polymorphisms on Response to Abatacept in Patients with Rheumatoid Arthritis
Source: MDPI journal article supplement (doi:10.3390/jpm11060573), 2021-06-18
Supplement: s1 [file s1]

**Table S4. Haplotype frequency estimation: EULAR response at 6 months of ABA**

| <b><i>FCGR2A</i></b><br>rs1801274 | <b><i>FCGR3A</i></b><br>rs396991 | <b>Total</b> | <b>EULAR response<br/>satisfactory</b> | <b>EULAR response<br/>unsatisfactory</b> | <b>Cumulative<br/>frequency</b> |
|-----------------------------------|----------------------------------|--------------|----------------------------------------|------------------------------------------|---------------------------------|
| A                                 | C                                | 0.2733       | 0.3596                                 | 0.2433                                   | 0.2733                          |
| G                                 | A                                | 0.265        | 0.2543                                 | 0.2799                                   | 0.5383                          |
| A                                 | A                                | 0.2642       | 0.2983                                 | 0.2384                                   | 0.8025                          |
| G                                 | C                                | 0.1975       | 0.0878                                 | 0.2384                                   | 1                               |
