# Supplementary material for: Influence of the FCGR2A rs1801274 and FCGR3A rs396991 Polymorphisms on Response to Abatacept in Patients with Rheumatoid Arthritis
Source: MDPI journal article supplement (doi:10.3390/jpm11060573), 2021-06-18
Supplement: s1 [file s1]

**Table S9. Haplotype frequency estimation: remission at 12 months of ABA**

| <b><i>FCGR2A</i></b><br>rs1801274 | <b><i>FCGR3A</i></b><br>rs396991 | <b>Total</b> | <b>Remission</b> | <b>No remission</b> | <b>Cumulative<br/>frequency</b> |
|-----------------------------------|----------------------------------|--------------|------------------|---------------------|---------------------------------|
| A                                 | C                                | 0.2909       | 0.2619           | 0.3022              | 0.2909                          |
| A                                 | A                                | 0.2567       | 0.2898           | 0.2438              | 0.5476                          |
| G                                 | A                                | 0.2528       | 0.2791           | 0.243               | 0.8004                          |
| G                                 | C                                | 0.1996       | 0.1692           | 0.211               | 1                               |
