# Supplementary material for: Influence of the FCGR2A rs1801274 and FCGR3A rs396991 Polymorphisms on Response to Abatacept in Patients with Rheumatoid Arthritis
Source: MDPI journal article supplement (doi:10.3390/jpm11060573), 2021-06-18
Supplement: s1 [file s1]

Table S12. Predictors of remission at 6 and 12 months of treatment with abatacept in rheumatoid arthritis patients (bivariate analysis)

|                      | 6 MONTHS  |               |                   |       |      |           |                      | 12 MONTHS |                 |               |       |    |        |
|----------------------|-----------|---------------|-------------------|-------|------|-----------|----------------------|-----------|-----------------|---------------|-------|----|--------|
| Clinical variable    | Remission |               |                   |       |      |           | Clinical variable    | Remission |                 |               |       |    |        |
|                      | N         | No Remission  | Remission         | p     | OR   | 95% CI    |                      | N         | No Remission    | Remission     | p     | OR | 95% CI |
| Sex                  |           |               |                   |       |      |           | Sex                  |           |                 |               |       |    |        |
| Women                | 89        | 78 (87.6)     | 11 (12.4)         | 0.169 | –    | –         | Women                | 75        | 56 (74.7)       | 19 (25.3)     | 0.471 | –  | –      |
| Men                  | 31        | 24 (77.4)     | 7 (22.6)          |       |      |           | Men                  | 30        | 20 (66.7)       | 10 (33.3)     |       |    |        |
| Smoking              |           |               |                   |       |      |           | Smoking              |           |                 |               |       |    |        |
| Smoker               | 18        | 13 (72.2)     | 5 (27.8)          | 0.211 | –    | –         | Smoker               | 16        | 11 (68.8)       | 5 (31.2)      | 0.816 | –  | –      |
| Ex-smoker            | 14        | 13 (92.9)     | 1 (7.1)           |       |      |           | Ex-smoker            | 12        | 8 (66.7)        | 4 (33.3)      |       |    |        |
| Non-smoker           | 88        | 76 (86.4)     | 12 (13.6)         |       |      |           | Non-smoker           | 77        | 57 (74)         | 20 (26)       |       |    |        |
| Age at Dx            | 120       | 45.56 ± 13.84 | 42.83 ± 13.53     | 0.439 | –    | –         | Age at Dx            | 105       | 45.76 ± 13.64   | 44.44 ± 15.29 | 0.670 | –  | –      |
| Years with RA        | 120       | 16 (10–21)    | 13.5 (6.75–21.25) | 0.142 | –    | –         | Years with RA        | 105       | 16.5 (12–22.25) | 10 (7–18)     | 0.655 | –  | –      |
| ABA start age        | 120       | 57.52 ± 13.13 | 51.56 ± 12.86     | 0.073 | –    | –         | ABA start age        | 105       | 58.46 ± 13.03   | 53.17 ± 13.77 | 0.070 | –  | –      |
| ABA duration         | 120       | 24 (14–45.25) | 25.5 (15–39.50)   | 0.015 | 1.02 | 1.01–1.03 | ABA duration         | 105       | 25 (16–42.5)    | 33 (22–55)    | 0.087 | –  | –      |
| Administr.           |           |               |                   |       |      |           | Administr.           |           |                 |               |       |    |        |
| SC                   | 68        | 59 (86.8)     | 9 (13.2)          | 0.609 | –    | –         | SC                   | 60        | 41 (68.3)       | 19 (31.7)     | 0.378 | –  | –      |
| IV                   | 52        | 43 (82.7)     | 9 (17.3)          |       |      |           | IV                   | 45        | 35 (77.8)       | 10 (22.2)     |       |    |        |
| Concomitant csDMARDs |           |               |                   |       |      |           | Concomitant csDMARDs |           |                 |               |       |    |        |
| MTX                  | 42        | 36 (85.7)     | 6 (14.3)          | 0.308 | –    | –         | MTX                  | 37        | 25 (67.6)       | 12 (32.4)     | 0.628 | –  | –      |

|                                 |     |            |            |       |      |            |                                 |     |            |           |       |      |            |
|---------------------------------|-----|------------|------------|-------|------|------------|---------------------------------|-----|------------|-----------|-------|------|------------|
| <b>LFN</b>                      | 14  | 10 (71.4)  | 4 (28.6)   |       |      |            | <b>LFN</b>                      | 13  | 9 (69.2)   | 4 (30.8)  |       |      |            |
| <b>none</b>                     | 64  | 56 (87.5)  | 8 (12.5)   |       |      |            | <b>none</b>                     | 55  | 42 (76.4)  | 13 (23.6) |       |      |            |
| <b>Concom. GCs</b>              |     |            |            |       |      |            | <b>Concom. GCs</b>              |     |            |           |       |      |            |
| <b>Yes</b>                      | 102 | 91 (89.2)  | 11 (10.8)  | 0.002 | 5.16 | 1.4–18.58  | <b>Yes</b>                      | 89  | 66 (74.2)  | 23 (25.8) | 0.337 | –    | –          |
| <b>No</b>                       | 18  | 11 (61.1)  | 7 (38.9)   |       |      |            | <b>No</b>                       | 16  | 10 (62.5)  | 6 (37.5)  |       |      |            |
| <b>Monotherapy</b>              |     |            |            |       |      |            | <b>Monotherapy</b>              |     |            |           |       |      |            |
| <b>No</b>                       | 113 | 99 (87.6)  | 14 (12.4)  | 0.001 | 9.13 | 1.39–68.97 | <b>No</b>                       | 98  | 71 (72.4)  | 27 (27.6) | 0.954 | –    | –          |
| <b>Yes</b>                      | 7   | 3 (42.9)   | 4 (57.1)   |       |      |            | <b>Yes</b>                      | 7   | 5 (71.4)   | 2 (28.6)  |       |      |            |
| <b>Number of previous BTs</b>   | 120 | 2 (1–3)    | 2 (1–3)    | 0.212 | –    | –          | <b>Number of previous BTs</b>   | 105 | 2 (1–3)    | 1 (0–2)   | 0.038 | 0.64 | 0.42–0.94  |
| <b>Duration of previous BTs</b> | 120 | 48 (24–72) | 24 (11–63) | 0.041 | 0.98 | 0.96–0.99  | <b>Duration of previous BTs</b> | 105 | 48 (24–84) | 24 (0–36) | 0.002 | 0.98 | 0.97–0.99  |
| <b>Previous BTs</b>             |     |            |            |       |      |            | <b>Previous BTs</b>             |     |            |           |       |      |            |
| <b>Naive</b>                    | 15  | 12 (80)    | 3 (20)     | 0.672 | –    | –          | <b>Naive</b>                    | 14  | 5 (35.7)   | 9 (64.3)  | 0.012 | 6.60 | 1.67–29.62 |
| <b>1 TNFi</b>                   | 31  | 25 (80.6)  | 6 (19.4)   |       |      |            | <b>1 TNFi</b>                   | 28  | 22 (78.6)  | 6 (21.4)  |       |      |            |
| <b>2 TNFis</b>                  | 34  | 29 (85.3)  | 5 (14.7)   |       |      |            | <b>2 TNFis</b>                  | 31  | 24 (77.4)  | 7 (22.6)  |       |      |            |
| <b>3 or more TNFis</b>          | 40  | 36 (90)    | 4 (10)     |       |      |            | <b>3 or more TNFis</b>          | 32  | 25 (78.1)  | 7 (21.9)  |       |      |            |
| <b>RF</b>                       |     |            |            |       |      |            | <b>RF</b>                       |     |            |           |       |      |            |
| <b>Negative</b>                 | 24  | 20 (83.3)  | 4 (16.7)   | 0.798 | –    | –          | <b>Negative</b>                 | 22  | 15 (68.2)  | 7 (31.8)  | 0.603 | –    | –          |
| <b>Positive</b>                 | 96  | 82 (85.4)  | 14 (14.6)  |       |      |            | <b>Positive</b>                 | 83  | 61 (73.5)  | 22 (26.5) |       |      |            |
| <b>ACPA</b>                     |     |            |            |       |      |            | <b>ACPA</b>                     |     |            |           |       |      |            |

|                         |     |               |                  |        |      |           |                         |     |                  |                  |        |      |           |
|-------------------------|-----|---------------|------------------|--------|------|-----------|-------------------------|-----|------------------|------------------|--------|------|-----------|
| <b>Negative</b>         | 35  | 31 (88.6)     | 4 (11.4)         | 0.583  | –    | –         | <b>Negative</b>         | 30  | 22 (73.3)        | 8 (26.7)         | 0.892  | –    | –         |
| <b>Positive</b>         | 85  | 71 (83.5)     | 14 (16.5)        |        |      |           | <b>Positive</b>         | 75  | 54 (72)          | 21 (28)          |        |      |           |
| <b>DAS28</b>            | 120 | 4.92 ± 1.42   | 3.43 ± 1.33      | <0.001 | 0.44 | 0.27–0.66 | <b>DAS28</b>            | 105 | 4.79 ± 1.23      | 4.20 ± 1.71      | 0.097  | –    | –         |
| <b>Baseline NPJ</b>     | 120 | 6.5 (3–10)    | 6 (0.75–8)       | <0.001 | 0.79 | 0.66–0.91 | <b>Baseline NPJ</b>     | 105 | 7 (3–10)         | 5 (2–8)          | 0.027  | 0.91 | 0.82–1.00 |
| <b>Baseline NSJ</b>     | 120 | 3 (0–6)       | 2 (0–3.25)       | <0.001 | 0.68 | 0.49–0.86 | <b>Baseline NSJ</b>     | 105 | 3 (1–6)          | 1 (0–4)          | 0.112  | –    | –         |
| <b>PVAS</b>             | 120 | 70 (50–80)    | 50 (30–60)       | <0.001 | 0.95 | 0.92–0.97 | <b>PVAS</b>             | 105 | 70 (57.5–80)     | 50 (30–70)       | <0.001 | 0.97 | 0.95–0.99 |
| <b>Baseline CRP</b>     | 120 | 2 (1–4)       | 2.65 (1.45–4.38) | 0.738  | –    | –         | <b>Baseline CRP</b>     | 105 | 2 (1–4)          | 2 (1.1–4.4)      | 0.946  | –    | –         |
| <b>Baseline ESR</b>     | 120 | 24 (10–41.25) | 20 (8–32.25)     | <0.001 | 0.94 | 0.89–0.98 | <b>Baseline ESR</b>     | 105 | 21.5 (10–44.25)  | 22 (11–32)       | 0.561  | –    | –         |
| <b>HAQ</b>              | 120 | 1.75 (1.18–2) | 1.25 (0.79–2)    | 0.001  | 0.32 | 0.14–0.67 | <b>HAQ</b>              | 105 | 1.75 (1.20–2.00) | 1.20 (0.75–1.60) | 0.006  | 0.43 | 0.22–0.80 |
| <b>FCGR2A rs1801274</b> |     |               |                  |        |      |           | <b>FCGR2A rs1801274</b> |     |                  |                  |        |      |           |
| <b>AA</b>               | 38  | 33 (86.8)     | 5 (13.2)         | 0.226  | –    | –         | <b>AA</b>               | 35  | 25 (71.4)        | 10 (28.6)        | 0.981  | –    | –         |
| <b>GG</b>               | 29  | 27 (93.1)     | 2 (6.9)          |        |      |           | <b>GG</b>               | 25  | 18 (72)          | 7 (28)           |        |      |           |
| <b>AG</b>               | 53  | 42 (79.2)     | 11 (20.8)        |        |      |           | <b>AG</b>               | 45  | 33 (73.3)        | 12 (26.7)        |        |      |           |
| <b>A</b>                | 91  | 75 (82.4)     | 16 (17.6)        | 0.161  | –    | –         | <b>A</b>                | 80  | 58 (72.5)        | 22 (27.5)        | 0.961  | –    | –         |
| <b>G</b>                | 82  | 69 (84.1)     | 13 (15.9)        | 0.789  | –    | –         | <b>G</b>                | 70  | 51 (72.9)        | 19 (27.1)        | 0.877  | –    | –         |
| <b>FCGR3A rs396991</b>  |     |               |                  |        |      |           | <b>FCGR3A rs396991</b>  |     |                  |                  |        |      |           |
| <b>CC</b>               | 22  | 19 (86.4)     | 3 (13.6)         | 0.313  | –    | –         | <b>CC</b>               | 21  | 18 (85.7)        | 3 (14.3)         | 0.311  | –    | –         |
| <b>AA</b>               | 29  | 27 (93.1)     | 2 (6.9)          |        |      |           | <b>AA</b>               | 23  | 16 (69.6)        | 7 (30.4)         |        |      |           |
| <b>CA</b>               | 69  | 56 (81.2)     | 13 (18.8)        |        |      |           | <b>CA</b>               | 61  | 42 (68.9)        | 19 (31.1)        |        |      |           |
| <b>C</b>                | 91  | 75 (82.4)     | 16 (17.6)        | 0.161  | –    | –         | <b>C</b>                | 82  | 60 (73.2)        | 22 (26.8)        | 0.794  | –    | –         |
| <b>A</b>                | 98  | 83 (84.7)     | 15 (15.3)        | 0.843  | –    | –         | <b>A</b>                | 84  | 58 (69)          | 26 (31)          | 0.175  | –    | –         |

|                                                     |     |         |            |       |   |   |                                                     |     |         |         |       |   |   |
|-----------------------------------------------------|-----|---------|------------|-------|---|---|-----------------------------------------------------|-----|---------|---------|-------|---|---|
| <b>Low-affinity allele<br/><i>FCGR2A/FCGR3A</i></b> | 120 | 2 (1–3) | 2 (1.25–2) | 0.438 | – | – | <b>Low-affinity allele<br/><i>FCGR2A/FCGR3A</i></b> | 105 | 2 (1–2) | 2 (1–3) | 0.406 | – | – |
|-----------------------------------------------------|-----|---------|------------|-------|---|---|-----------------------------------------------------|-----|---------|---------|-------|---|---|

ABA: abatacept; ACPA: anti-citrullinated protein antibody; AR: adverse reaction; BT: biological therapy; CI: confidence interval; CRP: C-reactive protein; csDMARD: conventional synthetic disease-modifying antirheumatic drug; DAS28: disease activity score in 28 joints; Dx: diagnosis; ESR: erythrocyte sedimentation rate; EULAR: European League Against Rheumatism criteria; GC: glucocorticoid; HAQ: Health Assessment Questionnaire; IV: intravenous; LFN: leflunomide; MTX: methotrexate; NPJ: number of painful joints; NSJ: number of swollen joints; OR: odds ratio; PVAS: patient visual analogue scale; RA: rheumatoid arthritis; RF: rheumatoid factor; SC: subcutaneous; SD: standard deviation; TNFi: tumor necrosis factor inhibitor.
