# Supplementary material for: Influence of the FCGR2A rs1801274 and FCGR3A rs396991 Polymorphisms on Response to Abatacept in Patients with Rheumatoid Arthritis
Source: MDPI journal article supplement (doi:10.3390/jpm11060573), 2021-06-18
Supplement: s1 [file s1]

**Table S3. Minor allele frequencies of SNPs.**

| Chr                                                                                | SNP       | Minor allele | Major allele | MAF    |
|------------------------------------------------------------------------------------|-----------|--------------|--------------|--------|
| 1                                                                                  | rs1801274 | G            | A            | 0.4609 |
| 1                                                                                  | rs396991  | C            | A            | 0.4609 |
| Chr: chromosome; MAF: minor allele frequency; SNP: single-nucleotide polymorphism. |           |              |              |        |
