# Supplementary material for: Influence of the FCGR2A rs1801274 and FCGR3A rs396991 Polymorphisms on Response to Abatacept in Patients with Rheumatoid Arthritis
Source: MDPI journal article supplement (doi:10.3390/jpm11060573), 2021-06-18
Supplement: s1 [file s1]

**Table S6. Haplotype frequency estimation: remission at 6 months of ABA**

| <b><i>FCGR2A</i></b><br>rs1801274 | <b><i>FCGR3A</i></b><br>rs396991 | <b>Total</b> | <b>Remission</b> | <b>No remission</b> | <b>Cumulative<br/>frequency</b> |
|-----------------------------------|----------------------------------|--------------|------------------|---------------------|---------------------------------|
| A                                 | C                                | 0.2733       | 0.4066           | 0.2595              | 0.2733                          |
| G                                 | A                                | 0.265        | 0.2955           | 0.2693              | 0.5383                          |
| A                                 | A                                | 0.2642       | 0.1768           | 0.2699              | 0.8025                          |
| G                                 | C                                | 0.1975       | 0.1212           | 0.2013              | 1                               |
