# Supplementary material for: Influence of the FCGR2A rs1801274 and FCGR3A rs396991 Polymorphisms on Response to Abatacept in Patients with Rheumatoid Arthritis
Source: MDPI journal article supplement (doi:10.3390/jpm11060573), 2021-06-18
Supplement: s1 [file s1]

**Table S1. Hardy-Weinberg equilibrium**

| Chr | SNP       | Sample | Minor Allele | Major Allele | Genotype counts | Observed heterozygosity | Expected heterozygosity | p-value |
|-----|-----------|--------|--------------|--------------|-----------------|-------------------------|-------------------------|---------|
| 1   | rs1801274 | Cases  | G            | A            | 31/56/41        | 0.438                   | 0.497                   | 0.212   |
| 1   | rs396991  | Cases  | C            | A            | 23/72/33        | 0.563                   | 0.497                   | 0.159   |

Chr: chromosome; SNP: single-nucleotide polymorphism.
