# Supplementary material for: Influence of the FCGR2A rs1801274 and FCGR3A rs396991 Polymorphisms on Response to Abatacept in Patients with Rheumatoid Arthritis
Source: MDPI journal article supplement (doi:10.3390/jpm11060573), 2021-06-18
Supplement: s1 [file s1]

Table S10. Predictors of EULAR response at 6 and 12 months of treatment with abatacept in rheumatoid arthritis patients (bivariate analysis)

|                             | 6 months       |                |                    |       |      |             |                             | 12 months      |                |                |       |    |        |
|-----------------------------|----------------|----------------|--------------------|-------|------|-------------|-----------------------------|----------------|----------------|----------------|-------|----|--------|
| Clinical variable           | EULAR response |                |                    |       |      |             | Clinical variable           | EULAR response |                |                |       |    |        |
|                             | N              | Unsatisfactory | Satisfactory       | p     | OR   | 95% CI      |                             | N              | Unsatisfactory | Satisfactory   | p     | OR | 95% CI |
| <b>Sex</b>                  |                |                |                    |       |      |             | <b>Sex</b>                  |                |                |                |       |    |        |
| <b>Women</b>                | 89             | 63 (70.8)      | 26 (29.2)          | 0.373 | –    | –           | <b>Women</b>                | 75             | 45 (60)        | 30 (40)        | 0.063 | –  | –      |
| <b>Men</b>                  | 31             | 19 (61.3)      | 12 (38.7)          |       |      |             | <b>Men</b>                  | 30             | 12 (40)        | 18 (60)        |       |    |        |
| <b>Smoking</b>              |                |                |                    |       |      |             | <b>Smoking</b>              |                |                |                |       |    |        |
| <b>Smoker</b>               | 18             | 12 (66.7)      | 6 (33.3)           | 0.602 | –    | –           | <b>Smoker</b>               | 16             | 7 (43.8)       | 9 (56.2)       | 0.594 | –  | –      |
| <b>Ex-smoker</b>            | 14             | 8 (57.1)       | 6 (42.9)           |       |      |             | <b>Ex-smoker</b>            | 12             | 6 (50)         | 6 (50)         |       |    |        |
| <b>Non-smoker</b>           | 88             | 62 (70.5)      | 26 (29.5)          |       |      |             | <b>Non-smoker</b>           | 77             | 44 (57.1)      | 33 (42.9)      |       |    |        |
| <b>Age at Dx</b>            | 120            | 45.22 ± 13.19  | 45.00 ± 14.97      | 0.935 | –    | –           | <b>Age at Dx</b>            | 105            | 44.53 ± 13.61  | 46.44 ± 14.64  | 0.490 | –  | –      |
| <b>Years with RA</b>        | 120            | 17 (12–22)     | 12 (7.25–18)       | 0.035 | 0.94 | 0.89 – 0.99 | <b>Years with RA</b>        | 105            | 17 (12–23)     | 13.5 (8–18.5)  | 0.064 | –  | –      |
| <b>ABA start age</b>        | 120            | 57.49 ± 12.87  | 54.76 ± 13.33      | 0.288 | –    | –           | <b>ABA start age</b>        | 105            | 57.44 ± 13.40  | 56.48 ± 13.49  | 0.716 | –  | –      |
| <b>ABA duration</b>         | 120            | 23 (13–35.75)  | 31.5 (16.25–48.75) | 0.067 | –    | –           | <b>ABA duration</b>         | 105            | 24 (16–44)     | 30.5 (20–50.5) | 0.211 | –  | –      |
| <b>Administr.</b>           |                |                |                    |       |      |             | <b>Administr.</b>           |                |                |                |       |    |        |
| <b>SC</b>                   | 68             | 43 (63.2)      | 25 (36.8)          | 0.235 | –    | –           | <b>SC</b>                   | 60             | 31 (51.7)      | 29 (48.3)      | 0.534 | –  | –      |
| <b>IV</b>                   | 52             | 39 (75)        | 13 (25)            |       |      |             | <b>IV</b>                   | 45             | 26 (57.8)      | 19 (42.2)      |       |    |        |
| <b>Concomitant csDMARDs</b> |                |                |                    |       |      |             | <b>Concomitant csDMARDs</b> |                |                |                |       |    |        |
| <b>MTX</b>                  | 42             | 30 (71.4)      | 12 (28.6)          | 0.592 | –    | –           | <b>MTX</b>                  | 37             | 20 (54.1)      | 17 (45.9)      | 0.998 | –  | –      |
| <b>LFN</b>                  | 14             | 8 (57.1)       | 6 (42.9)           |       |      |             | <b>LFN</b>                  | 13             | 7 (53.8)       | 6 (46.2)       |       |    |        |
| <b>none</b>                 | 64             | 44 (68.8)      | 20 (31.2)          |       |      |             | <b>none</b>                 | 55             | 30 (54.5)      | 25 (45.5)      |       |    |        |
| <b>Concom. GCs</b>          |                |                |                    |       |      |             | <b>Concom. GCs</b>          |                |                |                |       |    |        |

|                                 |     |             |                  |        |       |             |                                 |     |             |                  |        |      |            |
|---------------------------------|-----|-------------|------------------|--------|-------|-------------|---------------------------------|-----|-------------|------------------|--------|------|------------|
| <b>Yes</b>                      | 102 | 75 (73.5)   | 27 (26.5)        | 0.006  | 4.30  | 1.36–14.55  | <b>Yes</b>                      | 89  | 53 (59.6)   | 36 (40.4)        | 0.010  | 4.42 | 1.32–14.78 |
| <b>No</b>                       | 18  | 7 (38.9)    | 11 (61.1)        |        |       |             | <b>No</b>                       | 16  | 4 (25)      | 12 (75)          |        |      |            |
| <b>Monotherapy</b>              |     |             |                  |        |       |             | <b>Monotherapy</b>              |     |             |                  |        |      |            |
| <b>No</b>                       | 113 | 81 (71.7)   | 32 (28.3)        | 0.004  | 14.82 | 1.69–704.16 | <b>No</b>                       | 98  | 56 (57.1)   | 42 (42.9)        | 0.028  | 7.86 | 0.93–68.99 |
| <b>Yes</b>                      | 7   | 1 (14.3)    | 6 (85.7)         |        |       |             | <b>Yes</b>                      | 7   | 1 (14.3)    | 6 (85.7)         |        |      |            |
| <b>Number of previous BTs</b>   | 120 | 2 (1–3)     | 2 (1–3)          | 0.106  | –     | –           | <b>Number of previous BTs</b>   | 105 | 2 (1–3)     | 2 (1–3)          | 0.342  | –    | –          |
| <b>Duration of previous BTs</b> | 120 | 48 (24–84)  | 24 (9–45)        | 0.003  | 0.98  | 0.97–0.99   | <b>Duration of previous BTs</b> | 105 | 48 (24–84)  | 24 (9–51)        | 0.071  | –    | –          |
| <b>Previous BTs</b>             |     |             |                  |        |       |             | <b>Previous BTs</b>             |     |             |                  |        |      |            |
| <b>Naive</b>                    | 15  | 7 (46.7)    | 8 (53.3)         | 0.271  | –     | –           | <b>Naive</b>                    | 14  | 3 (21.4)    | 11 (78.6)        | 0.028  | 0.17 | 0.03–0.71  |
| <b>1 TNFi</b>                   | 31  | 21 (67.7)   | 10 (32.3)        |        |       |             | <b>1 TNFi</b>                   | 28  | 17 (60.7)   | 11 (39.3)        |        |      |            |
| <b>2 TNFis</b>                  | 34  | 25 (73.5)   | 9 (26.5)         |        |       |             | <b>2 TNFis</b>                  | 31  | 21 (67.7)   | 10 (32.3)        |        |      |            |
| <b>3 or more TNFis</b>          | 40  | 29 (72.5)   | 11 (27.5)        |        |       |             | <b>3 or more TNFis</b>          | 32  | 16 (50)     | 16 (50)          |        |      |            |
| <b>RF</b>                       |     |             |                  |        |       |             | <b>RF</b>                       |     |             |                  |        |      |            |
| <b>Negative</b>                 | 24  | 16 (66.7)   | 8 (33.3)         | 0.844  | –     | –           | <b>Negative</b>                 | 22  | 11 (50)     | 11 (50)          | 0.649  | –    | –          |
| <b>Positive</b>                 | 96  | 66 (68.8)   | 30 (31.2)        |        |       |             | <b>Positive</b>                 | 83  | 46 (55.4)   | 37 (44.6)        |        |      |            |
| <b>ACPA</b>                     |     |             |                  |        |       |             | <b>ACPA</b>                     |     |             |                  |        |      |            |
| <b>Negative</b>                 | 35  | 28 (80)     | 7 (20)           | 0.088  | –     | –           | <b>Negative</b>                 | 30  | 16 (53.3)   | 14 (46.7)        | 0.901  | –    | –          |
| <b>Positive</b>                 | 85  | 54 (63.5)   | 31 (36.5)        |        |       |             | <b>Positive</b>                 | 75  | 41 (54.7)   | 34 (45.3)        |        |      |            |
| <b>DAS28</b>                    | 120 | 5.14 ± 1.18 | 3.74 ± 1.47      | <0.001 | 0.42  | 0.90 – 1.89 | <b>DAS28</b>                    | 105 | 4.95 ± 1.07 | 4.25 ± 1.63      | 0.013  | 0.68 | 0.49–0.91  |
| <b>Baseline NPJ</b>             | 120 | 8 (4–11)    | 3 (0.25–6)       | <0.001 | 0.84  | 0.75–0.92   | <b>Baseline NPJ</b>             | 105 | 7 (4–10)    | 4.5 (2–8.25)     | 0.026  | 0.94 | 0.87–1.01  |
| <b>Baseline NSJ</b>             | 120 | 3.5 (1–6)   | 1 (0–3)          | <0.001 | 0.79  | 0.67–0.91   | <b>Baseline NSJ</b>             | 105 | 3 (2–5)     | 1.5 (0–5)        | 0.103  | –    | –          |
| <b>PVAS</b>                     | 120 | 70 (60–80)  | 50 (22.5–60.0)   | <0.001 | 0.94  | 0.92–0.97   | <b>PVAS</b>                     | 105 | 70 (60–80)  | 50 (30–70)       | <0.001 | 0.95 | 0.93–0.97  |
| <b>Baseline CRP</b>             | 120 | 2 (1–3.89)  | 2.55 (1.11–4.85) | 0.394  | –     | –           | <b>Baseline CRP</b>             | 105 | 2 (1–4.3)   | 2.04 (1.08–3.93) | 0.992  | –    | –          |

|                                              |     |                  |                  |        |      |           |                                              |     |               |                |       |      |           |
|----------------------------------------------|-----|------------------|------------------|--------|------|-----------|----------------------------------------------|-----|---------------|----------------|-------|------|-----------|
| <b>Baseline ESR</b>                          | 120 | 27 (14–44.5)     | 14 (8–30)        | 0.010  | 0.97 | 0.94–0.99 | <b>Baseline ESR</b>                          | 105 | 22 (12–45)    | 21 (9.75–34.5) | 0.387 | –    | –         |
| <b>HAQ</b>                                   | 120 | 1.75 (1.50–2.00) | 1.20 (0.75–1.73) | <0.001 | 0.32 | 0.16–0.58 | <b>HAQ</b>                                   | 105 | 1.75 (1.25–2) | 1.25 (0.75–2)  | 0.002 | 0.39 | 0.21–0.71 |
| <b>FCGR2A rs1801274</b>                      |     |                  |                  |        |      |           | <b>FCGR2A rs1801274</b>                      |     |               |                |       |      |           |
| <b>AA</b>                                    | 38  | 21 (55.3)        | 17 (44.7)        | 0.058  | –    | –         | <b>AA</b>                                    | 35  | 22 (62.9)     | 13 (37.1)      | 0.352 | –    | –         |
| <b>GG</b>                                    | 29  | 24 (82.8)        | 5 (17.2)         |        |      |           | <b>GG</b>                                    | 25  | 14 (56)       | 11 (44)        |       |      |           |
| <b>AG</b>                                    | 53  | 37 (69.8)        | 16 (30.2)        |        |      |           | <b>AG</b>                                    | 45  | 21 (46.7)     | 24 (53.3)      |       |      |           |
| <b>A</b>                                     | 91  | 58 (63.7)        | 33 (36.3)        | 0.067  | –    | –         | <b>A</b>                                     | 80  | 43 (53.8)     | 37 (46.2)      | 0.844 | –    | –         |
| <b>G</b>                                     | 82  | 61 (74.4)        | 21 (25.6)        | 0.056  | –    | –         | <b>G</b>                                     | 70  | 35 (50)       | 35 (50)        | 0.299 | –    | –         |
| <b>FCGR3A rs396991</b>                       |     |                  |                  |        |      |           | <b>FCGR3A rs396991</b>                       |     |               |                |       |      |           |
| <b>CC</b>                                    | 22  | 17 (77.3)        | 5 (22.7)         | 0.615  | –    | –         | <b>CC</b>                                    | 21  | 15 (71.4)     | 6 (28.6)       | 0.162 | –    | –         |
| <b>AA</b>                                    | 29  | 20 (69)          | 9 (31)           |        |      |           | <b>AA</b>                                    | 23  | 10 (43.5)     | 13 (56.5)      |       |      |           |
| <b>CA</b>                                    | 69  | 45 (65.2)        | 24 (34.8)        |        |      |           | <b>CA</b>                                    | 61  | 32 (52.5)     | 29 (47.5)      |       |      |           |
| <b>C</b>                                     | 91  | 62 (68.1)        | 29 (31.9)        | 0.933  | –    | –         | <b>C</b>                                     | 82  | 47 (57.3)     | 35 (42.7)      | 0.344 | –    | –         |
| <b>A</b>                                     | 98  | 65 (66.3)        | 33 (33.7)        | 0.448  | –    | –         | <b>A</b>                                     | 84  | 42 (50)       | 42 (50)        | 0.078 | –    | –         |
| <b>Low-affinity allele<br/>FCGR2A/FCGR3A</b> | 120 | 2 (1–3)          | 2 (1–2)          | 0.155  | –    | –         | <b>Low-affinity allele<br/>FCGR2A/FCGR3A</b> | 105 | 2 (1–2)       | 2 (1.75–3)     | 0.088 | –    | –         |

ABA: abatacept; ACPA: anti-citrullinated protein antibody; AR: adverse reaction; BT: biological therapy; CI: confidence interval; CRP: C-reactive protein; csDMARD: conventional synthetic disease-modifying antirheumatic drug; DAS28: disease activity score in 28 joints; Dx: diagnosis; ESR: erythrocyte sedimentation rate; EULAR: European League Against Rheumatism criteria; GC: glucocorticoid; HAQ: Health Assessment Questionnaire; IV: intravenous; LFN: leflunomide; MTX: methotrexate; NPJ: number of painful joints; NSJ: number of swollen joints; OR: odds ratio; PVAS: patient visual analogue scale; RA: rheumatoid arthritis; RF: rheumatoid factor; SC: subcutaneous; SD: standard deviation; TNFi: tumor necrosis factor inhibitor.
